# Supplementary material for: Elevated Expression of miR-200c/141 in MDA-MB-231 Cells Suppresses MXRA8 Levels and Impairs Breast Cancer Growth and Metastasis In Vivo
Source: MDPI journal article supplement (doi:10.3390/genes13040691), 2022-04-14
Supplement: s1 [file s1]

Supplemental File S1

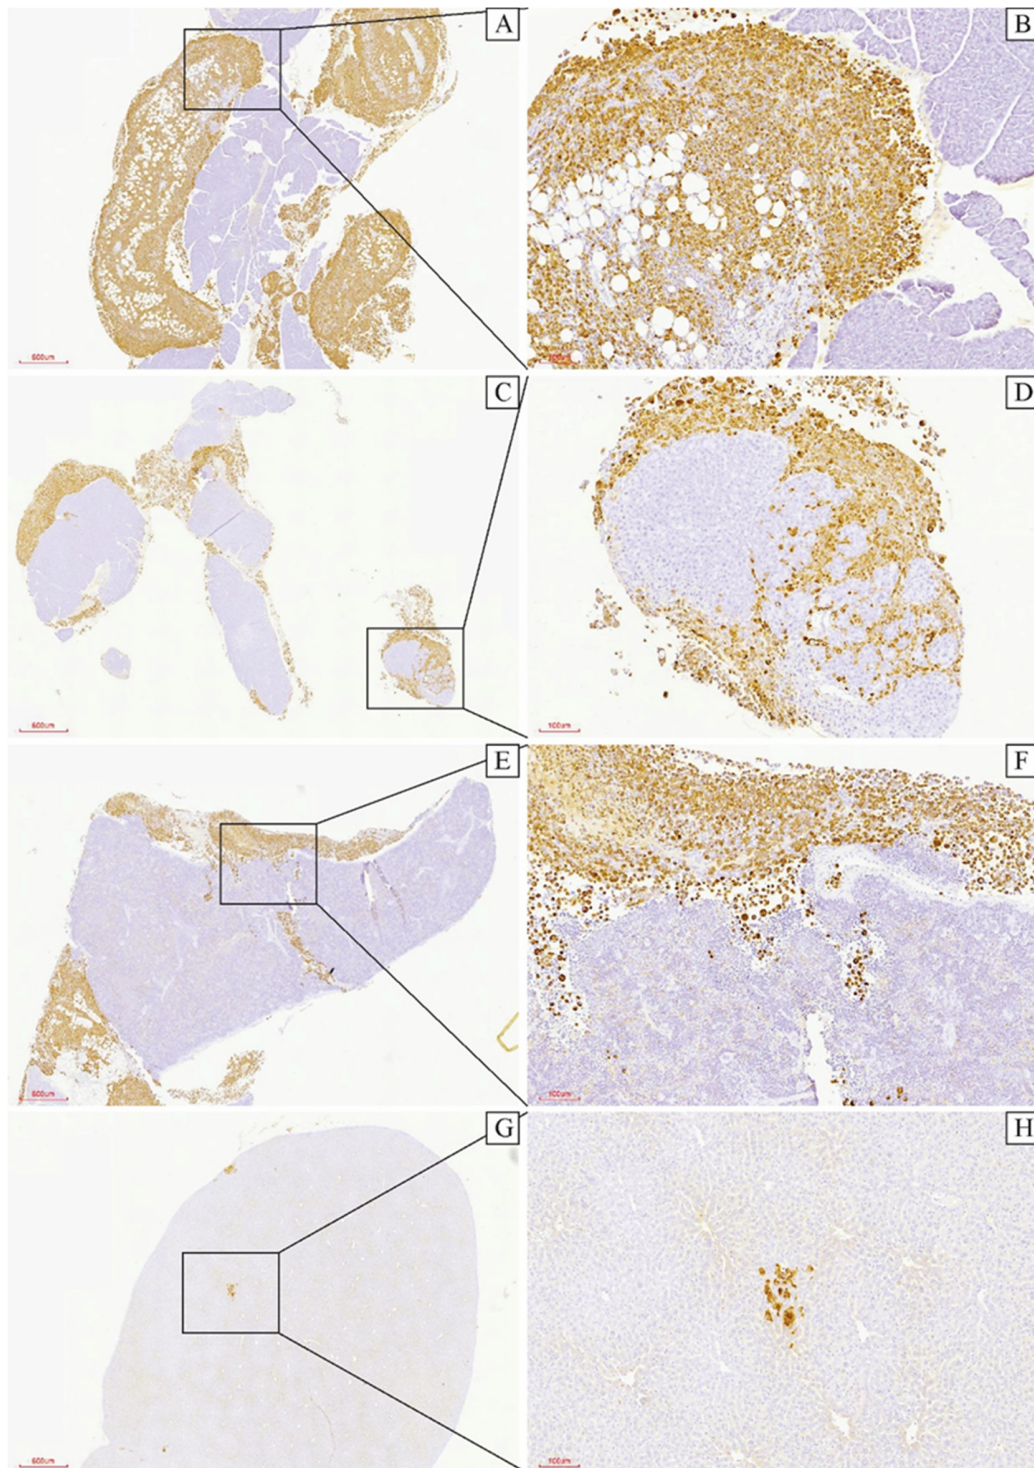

**Figure S1.** Vimentin stained metastatic MDA-231EV cells in (A–D) pancreas, (E,F) spleen, and (G,H) liver. Metastatic tumor cells were frequently found near the (A,B) pancreas and (E,F) spleen and (C,D) only rarely invaded the pancreas. Scale bars for A,C,E,G are 600  $\mu$ m and for B,D,F,H are 100  $\mu$ m.

Supplemental File S2

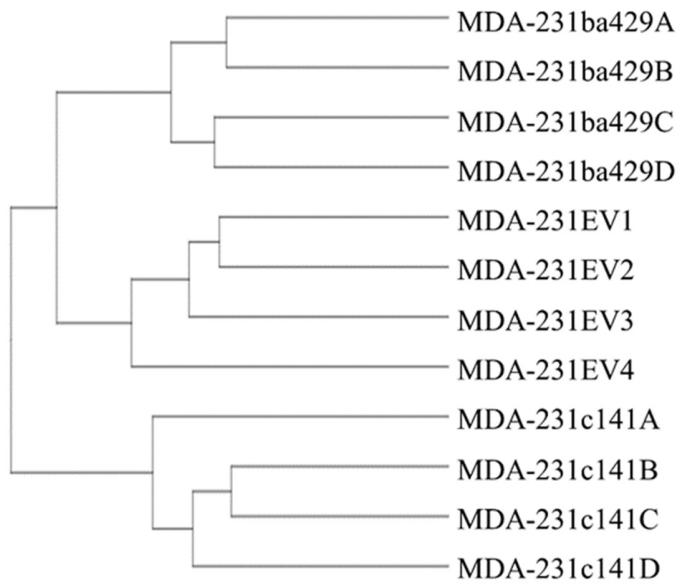

**Figure S2.** Hierarchical clustering of MDA-231EV, MDA-231c141 and MDA-231ba429 tumors.

Supplemental File Table S1

**Table S1.** Transcripts with miR-200c or miR-141 binding sites.

| Transcript       | miRDB      | MicroT-CDS  | miRwalk                                          |
|------------------|------------|-------------|--------------------------------------------------|
| <i>CPE</i>       | -          | -           | miR-200c-5p                                      |
| <i>GNG2</i>      | -          | -           | miR-141-3p, miR-141-5p, miR-200c-5p              |
| <i>MXRA8</i>     | -          | -           | miR-141-5p, miR-200c-3p                          |
| <i>SELENBP1</i>  | -          | -           | miR-141-5p, miR-200c-3p, miR-200c-5p             |
| <i>AGR2</i>      | -          | -           | miR-141-5p                                       |
| <i>JAG1</i>      | miR-141-3p | miR-141-3p  | miR-141-3p, miR-141-5p, miR-200c-3p, miR-200c-5p |
| <i>LCP1</i>      | -          | -           | miR-141-3p, miR-141-5p, miR-200c-3p              |
| <i>DYSF</i>      | -          | -           | miR-141-3p, miR-141-5p, miR-200c-3p              |
| <i>NKD1</i>      | miR-141-3p | -           | miR-141-5p, miR-200c-5p                          |
| <i>CALHM2</i>    | -          | -           | miR-200c-5p                                      |
| <i>AFAP1-AS1</i> | Not found  | Not found   | Not found                                        |
| <i>RAB9A</i>     | -          | miR-141-5p  | miR-141-5p, miR-200c-3p                          |
| <i>EDNRA</i>     | -          | miR-200c-3p | miR-141-3p, miR-141-5p, miR-200c-3p, miR-200c-5p |
| <i>FSIP2</i>     | Not found  | -           | miR-141-5p, miR-200c-5p                          |
| <i>SERPINF1</i>  | -          | -           | miR-200c-3p                                      |
